# Supplementary material for: Investigating Awareness of Patient Rights and Responsibilities Among Outpatients in a Tertiary Hospital Environment
Source: Research Square preprint supplement (doi:10.21203/rs.3.rs-6396749/v1), 2025-05-05
Supplement: Supplementary file 1 [file 935d5127e4fff6d8a2167c5d.docx]

**1.1 Levels of accreditation:**

This process begins with a Pre-Accreditation Entry-Level Certification, followed by Progressive-Level Certification, and ultimately leading to Complete Accreditation status.

**Pre-Accreditation Entry-Level Certification:** Hospitals begin their accreditation journey with this stage, allowing them to take incremental steps toward achieving full accreditation.

**Progressive-Level Certification:** This intermediate stage involves a more in-depth evaluation, ensuring that hospitals are progressing in their adherence to quality standards.

**Complete Accreditation:** This is the final stage where a healthcare organization has successfully met all the necessary criteria and is officially recognized as being accredited by NABH.

This approach allows hospitals to embark on the path to full accreditation through gradual, manageable steps, expanding the opportunity for a wider range of hospitals to enhance their service quality. The government's inclusion of incentives for NABH-accredited hospitals in its programs is seen as a positive measure for advancing the quality of patient care, as perceived by both patients and CEOs. To acknowledge, certify and reward hospitals for their commitment to service quality, NABH accreditation has been designated as a criterion for empanelment and certain incentives in government-sponsored health insurance initiatives.

**1.2 Relationship between Hospital Administration and NABH standards**

The relationship between hospital administration and NABH standards is intricate, with NABH providing the framework for establishing and upholding high-quality healthcare services. Hospital administration, embodying diverse managerial functions, plays a crucial role in the adoption and perpetuation of NABH standards.

Strategic planning is a fundamental aspect of hospital administration aligned with NABH standards. Hospital administrators are tasked with developing strategies that conform to NABH requirements, ensuring organizational preparedness for the accreditation process. This involves crafting policies and procedures that prioritize patient safety, quality care, and continuous improvement, all central elements of NABH standards.

Another vital link exists in resource management, where hospital administrators must allocate resources effectively to meet NABH benchmarks. This includes ensuring an ample number of qualified staff, maintaining appropriate infrastructure, and implementing technology that enhances patient care and safety – essential components of NABH accreditation.

Leadership and governance serve as essential components connecting hospital administration to NABH standards. Effective leadership is crucial to instill a culture of quality and patient-centric care throughout the organization. Hospital administrators must advocate for the adoption of NABH principles at all levels, fostering a commitment to continuous improvement and adherence to established standards.

**1.3 Patient rights and responsibilities:**

**Patient rights:**

Patient rights and responsibilities, integral aspects of NABH standards, require collaborative efforts between hospital administration and healthcare providers. Administrators are tasked with creating systems that protect patient rights, ensuring confidentiality, informed consent, and effective grievance redressed. They also contribute to promoting patient education by supporting initiatives that offer comprehensive information about healthcare processes and treatment options.

Patient rights encompass the legal and ethical entitlements of individuals receiving healthcare services, designed to safeguard their interests, well-being, and ensure equitable and confidential treatment.

The National Accreditation Board for Hospitals and Healthcare Providers (NABH), a prominent healthcare quality accreditation body in India, has outlined patient rights within their hospital standards. Key patient rights include:

**Right to Information:** Patients have the entitlement to be informed about their diagnosis, treatment options, and associated risks and benefits, presented in a language understandable to them.

**Right to Informed Consent:** Patients possess the right to provide consent before any medical procedure or treatment, requiring comprehensive information about the procedure, risks, benefits, and available alternatives.

**Right to Confidentiality:** Healthcare providers are ethically obligated to maintain patient information confidentiality. Patients have the right to keep personal and medical details private unless required by law.

**Right to Dignity and Respect:** Hospitals must uphold patient dignity, ensuring respectful treatment regardless of gender, race, religion, or social status. Female patients should have female healthcare providers during procedures.

**Right to Choose:** Patients have the absolute right to choose their healthcare provider, actively participate in decision-making, seek second opinions, and make informed decisions about their care.

**Right to Quality Care:** All patients have the right to receive safe, effective, and high-quality healthcare services without discrimination based on factors like caste, religion, or gender.

**Right to Complaint:** Patients can voice concerns and provide feedback about their healthcare experience without fear of retaliation. They can formally complain to designate officers within the healthcare facility.

**Right to Communication:** Patients have the right to know if support services are available and can request accommodations for conditions like speech or vision impairment or language barriers.

**Right to Transparency in Transactions:** Patients can request receipts for all medical procedures and treatments, inquire about expenses, and seek information about health schemes and insurance coverage.

**Right to Pain Management:** Patients have the right to information about pain management and relief methods, with healthcare providers addressing pain promptly and effectively.

**Right to Transfer and Continuity of Care:** Patients can question practitioners about transfers and have the right to stay in their current location unless clear explanations are provided for any necessary changes in their care.

These patient rights and responsibilities are often displayed in hospitals through posters, along with contact information for filing complaints or providing feedback.

**Patient responsibilities:**

Patient responsibility in the hospital pertains to the expectations and duties patients have in managing their healthcare. Adhering to these responsibilities not only enhances the quality of care but also ensures patient safety and well-being. Key patient responsibilities include:

**Providing Accurate Information:** Patients are accountable for offering precise and thorough details about their medical history, current health condition and medications. Sharing all relevant information is essential for a safe and effective treatment plan.

**Following Instructions:** Patients are obliged to adhere to healthcare providers' instructions, encompassing taking medications as prescribed, attending appointments, and following dietary or lifestyle recommendations. They must also communicate any deviations from the recommended plan.

**Respecting Healthcare Providers:** Patients bears the responsibility of treating healthcare providers with courtesy and respect, refraining from any form of verbal or physical abuse. Maintaining a considerate behavior that does not disturb other patients or disrupt the hospital environment is also their duty.

**Taking Care of Personal Belongings:** Patients are responsible for the safekeeping of their personal belongings including valuables and medical equipment, as hospitals are not accountable for their care.

**Paying for Services:** Patients are accountable for the payment of healthcare services either directly or through insurance, providing accurate or timely billing information. Ensuring that there are no pending delays or dues is part of the patient's responsibility.

NABH also provides guidelines on patients' rights and responsibilities through posters in hospitals, ensuring the respect and upholding of patient rights and responsibilities.

**Source:** https://nabh.co/Images/pdf/Patient_Charter-DMAI_NABH-new.pdf

**1.4 Benefits of patient rights and responsibilities:**

**For Patients**

The following are the benefits for patients by being aware of their rights and responsibilities:

**Empowerment:** Being aware of patients' rights and responsibilities empowers individuals in their healthcare journey. The right to information and active involvement in decision-making enables patients to make informed choices and navigate their healthcare wisely.

**Autonomy:** Patients' rights grant individuals the autonomy to make decisions regarding their bodies and healthcare. This includes the right to consent to or refuse treatment, uphold personal and cultural values, and have a say in their overall care plan.

**Confidentiality and Privacy:** Awareness of patients' rights ensures that individuals understand their right to confidentiality and privacy. This includes the protection of their medical information, diagnosis, and treatment details, which can only be disclosed with their consent.

**Redress and Feedback:** Patients' rights provide a mechanism for individuals to address concerns, register complaints, and offer feedback on their healthcare experiences.

**For Hospitals**

The following are the benefits for Hospitals by making patients being aware of their rights and education:

**Heightened Patient Satisfaction:** Providing patients with education about their rights and informing them about what to anticipate fosters transparency and nurtures trust. Contented and knowledgeable patients are more inclined to hold a favorable view of the hospital and its services.

**Enhanced Communication:** Patient education facilitates clear communication between healthcare providers and patients. Awareness of their rights establishes an atmosphere where patients feel at ease discussing concerns and preferences, promoting improved collaboration in their healthcare.

**Adherence to Legal and Ethical Standards:** Informing patients about their rights aligns with legal and ethical benchmarks, aiding the hospital in meeting NABH standards. This commitment demonstrates a dedication to upholding patient autonomy and confidentiality, critical for accreditation.

**Diminished Litigation Risks**: Well-informed patients are less likely to experience feelings of neglect or misunderstanding, reducing the likelihood of legal disputes. Providing clear communication and educating patients about their rights can mitigate dissatisfaction leading to legal action.

**Augmented Reputation:** Hospitals emphasizing patient education and rights are positively perceived by the community and stakeholders. This positive perception can contribute to an elevated reputation, attracting more patients and fostering partnerships.

**Efficient Conflict Resolution:** Patient awareness of their rights and understanding of healthcare processes enables more efficient resolution of conflicts or concerns. Informed patients are more likely to engage in constructive dialogue rather than resorting to formal complaints or legal action.

**Alignment with Accreditation Goals:** NABH accreditation emphasizes patient-centered care and compliance with specific standards. Patient education regarding their rights aligns with these principles, aiding the hospital in achieving and maintaining accreditation.

**Advancement of Patient-Centered Care:** Informing patients about their rights reinforces the concept of patient-centered care. Hospitals prioritizing patient education are more inclined to tailor their services to meet individual needs and preferences, fostering a patient-centric approach.

**Optimal Resource Utilization:** Educated patients are more likely to adhere to treatment plans, attend follow-up appointments, and adopt preventive measures. This can result in improved health outcomes and the efficient utilization of healthcare resources.

**Cultivation of a Culture of Continuous Improvement:** Hospitals actively engaging in patient education about their rights are more likely to foster a culture of continuous improvement. Feedback from well-informed patients can be invaluable in pinpointing areas for enhancement and refining healthcare delivery.

The accreditation process serves as a focal point where hospital administration intersects with NABH standards. Administrators lead the coordination of activities required for accreditation, overseeing the implementation of quality improvement initiatives, conducting internal audits, and facilitating staff training to meet NABH requirements.

Continuous monitoring and evaluation, inherent in hospital administration practices, closely align with NABH's emphasis on continual improvement. Administrators consistently assess the effectiveness of implemented standards, identify areas for improvement, and implement corrective measures to ensure sustained compliance with NABH benchmarks.

**1.5 Awareness of patient rights and responsibilities:**

In the contemporary healthcare landscape, ensuring that patients possess adequate knowledge about their rights is crucial for fostering patient autonomy, satisfaction, and overall quality of care. This research delves into the examination and comparison of patients' awareness regarding their rights and educational initiatives among outpatients in two distinct healthcare settings: a single specialty hospital and a tertiary care hospital. Employing a quantitative methodology with a semi-structured questionnaire, this study seeks to identify disparities in awareness of patient’s rights and education between these two types of hospitals. The primary goal of this comparative research is to quantitatively evaluate and contrast the awareness levels of outpatients regarding their rights in a specialized hospital and a tertiary care hospital. The study aims to unveil potential variations in awareness levels and educational requirements, offering insights that can guide targeted enhancements in patient education strategies.

A convenience sampling method was used to collect data from outpatients on their awareness of patients' rights and education. Statistical analyses, including descriptive and inferential methods using SPSS, were applied to compare data from the two hospital settings. The quantitative data analysis demonstrates whether the awareness of patients in the outpatient care of a single specialty hospital differs from that in a tertiary hospital. Demographic factors such as age, education, and Gender are examined to comprehend their impact on patient awareness in each context. The findings underscore the importance of tailoring patient education strategies based on the unique characteristics of healthcare facilities. The implementation of context-specific improvements in education can contribute to a more informed and empowered patient population, fostering patient-centered care across diverse healthcare settings.
